# Supplementary material
Source: HighWire-hosted journal article supplement (https://erj.ersjournals.com/content/55/5/2000636)
Supplement: inline-supplementary-material-1 [file inline-supplementary-material-1.pdf]

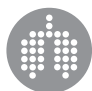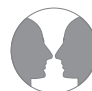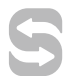

SHAREABLE PDF

# A clinically significant bronchodilator response in children: how should it be measured?

Carmen C.M. de Jong <sup>1</sup>, Eva S.L. Pedersen<sup>1</sup>, R. Mozun <sup>1</sup>, Myrofora Goutaki <sup>1,2</sup>, Daniel Trachsel<sup>3</sup>, Juerg Barben<sup>4</sup> and Claudia E. Kuehni <sup>1,2</sup>

**Affiliations:** <sup>1</sup>Institute of Social and Preventive Medicine, University of Bern, Bern, Switzerland. <sup>2</sup>Paediatric Respiratory Medicine, Children's University Hospital of Bern, University of Bern, Bern, Switzerland. <sup>3</sup>Paediatric Respiratory Medicine, Children's University Hospital of Basel, Basel, Switzerland. <sup>4</sup>Paediatric Respiratory Medicine, Children's Hospital of Eastern Switzerland, St Gallen, Switzerland.

**Correspondence:** Claudia E. Kuehni, University of Bern, Institute of Social and Preventive Medicine, Mittelstrasse 43, CH-3012 Bern, Switzerland. E-mail: claudia.kuehni@ispm.unibe.ch

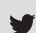

@ERSpublications

More research is needed to evaluate the usefulness of diagnostic tests for asthma in children and cut-offs should be critically questioned and defined based on evidence from the patient population of interest <https://bit.ly/33xjLVW>

**Cite this article as:** de Jong CCM, Pedersen ESL, Mozun R, *et al.* A clinically significant bronchodilator response in children: how should it be measured?. *Eur Respir J* 2020; 55: 2000636 [<https://doi.org/10.1183/13993003.00636-2020>].

This single-page version can be shared freely online.

## From the authors:

We thank F. Guezguez and H. Ben Saad for raising important questions on recommendations for assessing a bronchodilator response (BDR) in children. The authors summarise how recommended outcome measures and cut-offs for BDR in children vary between guidelines, and raise questions about our study [1].
